# Supplementary material for: A non-neutralizing antibody broadly protects against influenza virus infection by engaging effector cells
Source: PubMed Central journal article supplement (PMC8341508; doi:10.1371/journal.ppat.1009724), 2021-08-05

# PLOS Pathogens

## A non-neutralizing antibody broadly protects against influenza virus infection by engaging effector cells

--Manuscript Draft--

|                                                                                                                                                                                                                                                                                                                                                                                                                                                                                                    |                                                                                                                                                                                                                                                                                                                                                                                                                                                                                                                                                                                                                                                                                                                                                                                                                                                                                                                                                                                                                                                                                                                                                                                                                                                     |
|----------------------------------------------------------------------------------------------------------------------------------------------------------------------------------------------------------------------------------------------------------------------------------------------------------------------------------------------------------------------------------------------------------------------------------------------------------------------------------------------------|-----------------------------------------------------------------------------------------------------------------------------------------------------------------------------------------------------------------------------------------------------------------------------------------------------------------------------------------------------------------------------------------------------------------------------------------------------------------------------------------------------------------------------------------------------------------------------------------------------------------------------------------------------------------------------------------------------------------------------------------------------------------------------------------------------------------------------------------------------------------------------------------------------------------------------------------------------------------------------------------------------------------------------------------------------------------------------------------------------------------------------------------------------------------------------------------------------------------------------------------------------|
| <b>Manuscript Number:</b>                                                                                                                                                                                                                                                                                                                                                                                                                                                                          | PPATHOGENS-D-20-02567                                                                                                                                                                                                                                                                                                                                                                                                                                                                                                                                                                                                                                                                                                                                                                                                                                                                                                                                                                                                                                                                                                                                                                                                                               |
| <b>Full Title:</b>                                                                                                                                                                                                                                                                                                                                                                                                                                                                                 | A non-neutralizing antibody broadly protects against influenza virus infection by engaging effector cells                                                                                                                                                                                                                                                                                                                                                                                                                                                                                                                                                                                                                                                                                                                                                                                                                                                                                                                                                                                                                                                                                                                                           |
| <b>Short Title:</b>                                                                                                                                                                                                                                                                                                                                                                                                                                                                                | Broadly protective antibody against Flu                                                                                                                                                                                                                                                                                                                                                                                                                                                                                                                                                                                                                                                                                                                                                                                                                                                                                                                                                                                                                                                                                                                                                                                                             |
| <b>Article Type:</b>                                                                                                                                                                                                                                                                                                                                                                                                                                                                               | Research Article                                                                                                                                                                                                                                                                                                                                                                                                                                                                                                                                                                                                                                                                                                                                                                                                                                                                                                                                                                                                                                                                                                                                                                                                                                    |
| <b>Section/Category:</b>                                                                                                                                                                                                                                                                                                                                                                                                                                                                           | Virology                                                                                                                                                                                                                                                                                                                                                                                                                                                                                                                                                                                                                                                                                                                                                                                                                                                                                                                                                                                                                                                                                                                                                                                                                                            |
| <b>Keywords:</b>                                                                                                                                                                                                                                                                                                                                                                                                                                                                                   | influenza virus; monoclonal antibody; effector function                                                                                                                                                                                                                                                                                                                                                                                                                                                                                                                                                                                                                                                                                                                                                                                                                                                                                                                                                                                                                                                                                                                                                                                             |
| <b>Abstract:</b>                                                                                                                                                                                                                                                                                                                                                                                                                                                                                   | <p>Hemagglutinin (HA) is the immunodominant protein of the influenza virus. We previously showed that mice injected with a monoglycosylated influenza A HA (HA<sub>mg</sub>) produced cross-strain-reactive antibodies and were better protected than mice injected with a fully glycosylated HA (HA<sub>fg</sub>) during lethal dose challenge. We employed a single B-cell screening platform to isolate the cross-protective monoclonal antibody (mAb) 651 from mice immunized with the HA<sub>mg</sub> of A/ Brisbane/59/2007 (H1N1) influenza virus (Bris/07). The mAb 651 recognized the head domain of a broad spectrum of HAs from groups 1 and 2 influenza A viruses and offered prophylactic and therapeutic efficacy against A/California/07/2009 (H1N1) (Cal/09) and Bris/07 infections in mice. The antibody did not possess neutralizing activity; however, antibody-dependent cellular cytotoxicity and antibody-dependent cellular phagocytosis mediated by nature killer cells and alveolar macrophages were important in the protective efficacy of mAb 651. Together, this study highlighted the significance of effector functions for non-neutralizing antibodies to exhibit protection against influenza virus infection.</p> |
| <b>Additional Information:</b>                                                                                                                                                                                                                                                                                                                                                                                                                                                                     |                                                                                                                                                                                                                                                                                                                                                                                                                                                                                                                                                                                                                                                                                                                                                                                                                                                                                                                                                                                                                                                                                                                                                                                                                                                     |
| <b>Question</b>                                                                                                                                                                                                                                                                                                                                                                                                                                                                                    | <b>Response</b>                                                                                                                                                                                                                                                                                                                                                                                                                                                                                                                                                                                                                                                                                                                                                                                                                                                                                                                                                                                                                                                                                                                                                                                                                                     |
| <b>Financial Disclosure</b><br><br>Enter a financial disclosure statement that describes the sources of funding for the work included in this submission. Review the <a href="#">submission guidelines</a> for detailed requirements. View published research articles from <a href="#">PLOS Pathogens</a> for specific examples.<br><br>This statement is required for submission and <b>will appear in the published article</b> if the submission is accepted. Please make sure it is accurate. | <p>This work was supported by grants from Academia Sinica (AS-SUMMIT-109 to CHW, AS-IA-107-L05 to KIL), Taiwan, and Ministry of Science and Technology (MOST 109-2320-B-001-023-MY3 to KIL).</p> <p>The funders had no role in study design, data collection and analysis, decision to publish, or preparation of the manuscript.</p>                                                                                                                                                                                                                                                                                                                                                                                                                                                                                                                                                                                                                                                                                                                                                                                                                                                                                                               |

**Unfunded studies**

Enter: *The author(s) received no specific funding for this work.*

**Funded studies**

Enter a statement with the following details:

- Initials of the authors who received each award
- Grant numbers awarded to each author
- The full name of each funder
- URL of each funder website
- Did the sponsors or funders play any role in the study design, data collection and analysis, decision to publish, or preparation of the manuscript?
- **NO** - Include this sentence at the end of your statement: *The funders had no role in study design, data collection and analysis, decision to publish, or preparation of the manuscript.*
- **YES** - Specify the role(s) played.

\* typeset

**Competing Interests**

Use the instructions below to enter a competing interest statement for this submission. On behalf of all authors, disclose any [competing interests](#) that could be perceived to bias this work—acknowledging all financial support and any other relevant financial or non-financial competing interests.

This statement **will appear in the published article** if the submission is accepted. Please make sure it is accurate. View published research articles from [PLOS Pathogens](#) for specific examples.

The authors have declared that no conflicts of interest exist.

|                                                                                                                                                                                                                                                                                                                                                                                                                                                                                                                                                                                                                                                                                                                                                                                                                                                                                                                                                                                    |                                                               |
|------------------------------------------------------------------------------------------------------------------------------------------------------------------------------------------------------------------------------------------------------------------------------------------------------------------------------------------------------------------------------------------------------------------------------------------------------------------------------------------------------------------------------------------------------------------------------------------------------------------------------------------------------------------------------------------------------------------------------------------------------------------------------------------------------------------------------------------------------------------------------------------------------------------------------------------------------------------------------------|---------------------------------------------------------------|
| <p><b>NO authors have competing interests</b></p> <p>Enter: <i>The authors have declared that no competing interests exist.</i></p> <p><b>Authors with competing interests</b></p> <p>Enter competing interest details beginning with this statement:</p> <p><i>I have read the journal's policy and the authors of this manuscript have the following competing interests: [insert competing interests here]</i></p> <p>* typeset</p>                                                                                                                                                                                                                                                                                                                                                                                                                                                                                                                                             |                                                               |
| <p><b>Data Availability</b></p> <p>Authors are required to make all data underlying the findings described fully available, without restriction, and from the time of publication. PLOS allows rare exceptions to address legal and ethical concerns. See the <a href="#">PLOS Data Policy</a> and <a href="#">FAQ</a> for detailed information.</p> <p>A Data Availability Statement describing where the data can be found is required at submission. Your answers to this question constitute the Data Availability Statement and <b>will be published in the article</b>, if accepted.</p> <p><b>Important:</b> Stating 'data available on request from the author' is not sufficient. If your data are only available upon request, select 'No' for the first question and explain your exceptional situation in the text box.</p> <p>Do the authors confirm that all data underlying the findings described in their manuscript are fully available without restriction?</p> | <p>Yes - all data are fully available without restriction</p> |
| <p><b>Describe where the data may be found in full sentences. If you are copying our sample text, replace any instances of XXX with the appropriate details.</b></p> <ul style="list-style-type: none"> <li>• If the data are held or will be held in a</li> </ul>                                                                                                                                                                                                                                                                                                                                                                                                                                                                                                                                                                                                                                                                                                                 | <p>NA</p>                                                     |

**public repository**, include URLs, accession numbers or DOIs. If this information will only be available after acceptance, indicate this by ticking the box below. For example: *All **XXX** files are available from the **XXX** database (accession number(s) **XXX**, **XXX**).*

- If the data are all contained **within the manuscript and/or Supporting Information files**, enter the following:

*All relevant data are within the manuscript and its Supporting Information files.*

- If neither of these applies but you are able to provide **details of access elsewhere**, with or without limitations, please do so. For example:

*Data cannot be shared publicly because of **[XXX]**. Data are available from the **XXX** Institutional Data Access / Ethics Committee (contact via **XXX**) for researchers who meet the criteria for access to confidential data.*

*The data underlying the results presented in the study are available from (include the name of the third party and contact information or URL).*

- This text is appropriate if the data are owned by a third party and authors do not have permission to share the data.

\* typeset

Additional data availability information:



1 **A non-neutralizing antibody broadly protects against influenza virus infection by**  
2 **engaging effector cells**

3 Yi-An Ko<sup>1, #</sup>, Yueh-Hsiang Yu<sup>1, #</sup>, Yen-Fei Wu<sup>1</sup>, Yung-Chieh Tseng<sup>1</sup>, Chia-Lin Chen<sup>1</sup>,  
4 King-Siang Goh<sup>1</sup>, Hsin-Yu Liao<sup>1</sup>, Ting-Hua Chen<sup>1</sup>, Ting-Jen Rachel Cheng<sup>1</sup>, An-Suei Yang<sup>1</sup>,  
5 Chi-Huey Wong<sup>1</sup>, Che Ma<sup>1,2</sup> and Kuo-I Lin<sup>1,2,\*</sup>

6 <sup>1</sup>Genomics Research Center, Academia Sinica, Taipei 11529, Taiwan

7 # Equal contribution

8 <sup>2</sup>C. M. and K.-I L. share senior authorship

9

10 Address correspondence and reprint requests to

11 Kuo-I Lin, Genomics Research Center, Academia Sinica, No. 128, Section 2, Academia Road,

12 Nankang District, Taipei 115, Taiwan. Phone: +886-2-2787-1253, Fax: +886-2-2789-9931;

13 email: [kuoilin@gate.sinica.edu.tw](mailto:kuoilin@gate.sinica.edu.tw)

14

15 Left Running head: Ko et al.

16 Right Running head: Broadly protective antibody against Flu

17 Abstract word count: 159

18

19 **Abstract**

20 Hemagglutinin (HA) is the immunodominant protein of the influenza virus. We previously  
21 showed that mice injected with a monoglycosylated influenza A HA (HA<sub>mg</sub>) produced  
22 cross-strain-reactive antibodies and were better protected than mice injected with a fully  
23 glycosylated HA (HA<sub>fg</sub>) during lethal dose challenge. We employed a single B-cell screening  
24 platform to isolate the cross-protective monoclonal antibody (mAb) 651 from mice  
25 immunized with the HA<sub>mg</sub> of A/ Brisbane/59/2007 (H1N1) influenza virus (Bris/07). The  
26 mAb 651 recognized the head domain of a broad spectrum of HAs from groups 1 and 2  
27 influenza A viruses and offered prophylactic and therapeutic efficacy against  
28 A/California/07/2009 (H1N1) (Cal/09) and Bris/07 infections in mice. The antibody did not  
29 possess neutralizing activity; however, antibody-dependent cellular cytotoxicity and  
30 antibody-dependent cellular phagocytosis mediated by nature killer cells and alveolar  
31 macrophages were important in the protective efficacy of mAb 651. Together, this study  
32 highlighted the significance of effector functions for non-neutralizing antibodies to exhibit  
33 protection against influenza virus infection.

34

35 **Author Summary**

36 The protective efficacy of antibodies is generally related to their neutralization potency. Here,  
37 we isolated a monoclonal antibody from mice injected with monoglycosylated hemagglutinin

38 protein-based universal flu vaccine, and demonstrated a head-domain recognizing, but  
39 non-neutralizing, monoclonal antibody carried prophylactic and therapeutic efficacy against a  
40 broad spectrum of influenza virus infections *in vivo* via effector functions.

41

## 42 **Introduction**

43 Influenza viral infections cause a contagious respiratory illness of the upper airways and lungs.  
44 Approximately half a million deaths worldwide are due to seasonal flu each year [1].  
45 Influenza viruses belong to the *Orthomyxoviridae* family, whose genomes encode 11 proteins,  
46 including the major surface glycoproteins hemagglutinin (HA) and neuraminidase (NA) [2].  
47 Influenza viruses are classified into three subtypes: A, B, and C. Among which, the A and B  
48 subtypes are responsible for the seasonal flu in humans [2]. Although the influenza vaccine is  
49 currently in use for controlling the spread of seasonal flu each year, the trivalent inactivated  
50 influenza vaccine only confers protection in around two thirds of those vaccinated [3]. More  
51 severe complications resulting from influenza viral infection and a loss of influenza vaccine  
52 efficacy have been found in older adults [4, 5]. Thus, there remains a need to develop new  
53 strategies to overcome the moderate responses and narrow coverage range of the current flu  
54 vaccine.

55 Advances in antibody engineering technologies have enabled the isolation of several  
56 neutralizing antibodies against influenza viruses from either infected patients or donors with  
57 extensive vaccinations [6-10]. These anti-flu neutralizing monoclonal antibodies (mAbs)  
58 target HA, which comprises a variable immunodominant globular head domain or a more  
59 conserved immune-subdominant stem domain [11, 12]. Most of the broadly neutralizing  
60 antibodies target the stem region of HA and have less potent direct neutralization activity [11,

61 12]. Other neutralizing antibodies bind to the head region of HA and generally possess a  
62 potent ability to directly inhibit virus entry [12]. Recently, non-neutralizing mAbs recognizing  
63 the HA globular head domain trimer interface have been reported that limit the spread of  
64 influenza viruses and protect against infection by various flu strains in mice [10, 13]. In  
65 addition to the abovementioned modes of action, antibodies can eliminate infected cells  
66 through effector functions, such as antibody-dependent cellular cytotoxicity (ADCC) [14], in  
67 which **nature killer** (NK) cells with Fc receptors (FcRs) are the primary effector cells [15]. It  
68 has been demonstrated that mAbs targeting the stem region of HA can mediate ADCC [16].  
69 Additionally, antibody-dependent cellular phagocytosis (ADCP), which involves the ingestion  
70 of antibody-opsonized influenza virus particles by alveolar macrophages, has also been shown  
71 to be involved in the clearance of influenza viruses [17].

72 Changing the glycan abundance of HA can affect its immunogenicity [18, 19]. We  
73 developed a monoglycosylated HA (HA<sub>mg</sub>) protein-based universal flu vaccine by treating HA  
74 with endoglycosidase H. **HA<sub>mg</sub> served as an effective vaccine providing broader protection**  
75 **against infection by various influenza virus strains than the fully glycosylated HA (HA<sub>fg</sub>) in**  
76 **animal models** [20, 21]. One mAb, 651, isolated from HA<sub>mg</sub>-immunized mice, was subjected  
77 to functional characterization in this study. Although it lacks neutralizing activities *in vitro*,  
78 651 is able to recognize the head region of a broad range of HA proteins and protect against  
79 infection by several H1N1 viruses through effector functions *in vivo*. Thus, we demonstrated a

80 unique mode of action for a non-neutralizing mAb that can offer cross-strain protection  
81 against influenza virus infection through FcR-mediated effector functions. The results  
82 highlight the potential significance of non-neutralizing antibodies in host responses against  
83 viral infections.

84

## 85 **Results and Discussion**

### 86 **Generation of mAb 651 from Bris/07 HA<sub>mg</sub>-immunized mice**

87 We previously demonstrated that the HA<sub>mg</sub> vaccine elicits antibody responses that recognize a  
88 broader spectrum of influenza viruses than the HA<sub>fg</sub> vaccine [21]. We aimed to isolate broadly  
89 neutralizing mAbs from mice immunized with HA<sub>mg</sub> proteins prepared from the  
90 A/Brisbane/59/2007 (H1N1) (Bris/07) influenza virus. By using a single B-cell antibody  
91 screening technique, we isolated and expressed the HA<sub>mg</sub>-specific chimeric mAbs (Fig 1A).  
92 We identified on a specific mAb, 651, which recognized the broad recognition of HA proteins  
93 from different strains of influenza virus, including group 1 and group 2 influenza A virus  
94 subtypes (Fig 1B). Quantitative measurement using an antibody affinity assay showed that  
95 651 possessed a higher affinity to HA<sub>mg</sub> than HA<sub>fg</sub> from both A/Brisbane/59/2007 (H1N1)  
96 (Bris/07) and A/California/7/09 (H1N1) (Cal/09) (Fig 1C).

97 The structure and conformation of HA are important for its recognition by 651, as  
98 decreased binding was observed after HA was treated with 2-ME, which disrupted its protein

99 conformation (Fig 1D). ELISA results showed that 651 bound to the intact HA, but not to the  
100 stem region, of Bris/07 (Fig 1E), implying that 651 mainly recognizes the globular head  
101 domain of HA. Supporting this notion, the results of a hydrogen-deuterium exchange-mass  
102 spectrometry (HDX-MS) assay showed that there was one region recognized by 651. The  
103 mAb 651 interacts with the globular head region near a glycosylation site of HA from Bris/07  
104 (S1A Fig). Sequence alignment of the identified Bris/07 HA peptide with the HA proteins  
105 from several influenza viruses revealed that this 651-binding region in the head globular  
106 domain is relatively conserved in Bris/07 and Cal/09, and is close to the N-glycosylation site  
107 (S1B Fig). Typically, anti-influenza virus antibodies that recognize the globular head domain  
108 possess hemagglutination inhibition (HI) and neutralizing activity but show less  
109 cross-reactivity compared with antibodies against the stem region [12, 22]. Although 651  
110 recognizes the HA of a panel of influenza viruses, it does not possess neutralizing activity  
111 against Bris/07 (H1), Cal/09 (H1), NIBRG-14 (H5), or Vic/11 (H3) influenza viruses (Fig 1F).  
112 Furthermore, 651 did not show HI activity against the Cal/09 virus (S1C Fig). Therefore, we  
113 have isolated a mAb 651 derived from Bris/07 HA<sub>mg</sub>-immunized mice that targets the  
114 globular head region of various HA proteins but has no neutralizing activity.

115

116 **mAb 651 confers preventive and therapeutic efficacy through FcγR**

117 Because 651 binds to various strains of influenza virus, we next sought to understand its  
118 biological functions *in vivo*. Mice were intraperitoneally injected with two different 651 doses  
119 2 h before viral infection (Fig 2A). To our surprise, pretreatment with 651 provided a  
120 dose-dependent protection against Bris/07 infection (Fig 2B) and a complete protection  
121 against Cal/09 infection (Fig 2C). The better prophylactic efficacy against Cal/09 correlated  
122 with the stronger binding affinity of 651 to the HA of the Cal/09 strain than to that of Bris/07  
123 (Fig 1C).

124 We then examined the therapeutic efficacy of 651. Mice were administered the  
125 antibodies 1 day after infection with influenza virus (Fig 2D). Again, the survival rates were  
126 significantly improved in the 651-treated groups after Cal/09 infection. Improved, although  
127 not statistically significant, survival rates were observed in the high-dose 651-treated mice  
128 after Bris/07 infection (Fig 2E). Remarkably, mice provided a high dose of 651 1 day after  
129 Cal/09 infection were completely protected from a lethal dose Cal/09 challenge on day 14  
130 (Fig 2F). Weight loss following viral infection was also prevented in the mice treated with  
131 651 before or after infection (S2A–S2D Fig). F10 was used as a positive control antibody, as  
132 it has prophylactic and therapeutic efficacy against a broad spectrum of group 1 human  
133 influenza A viruses [23]. Our results showed 651 and F10 had comparable preventive and  
134 therapeutic efficacies (Fig 2A–2F and S2A–S2D Fig). Thus, 651 provided notable protective  
135 efficacy against influenza viral infection *in vivo*, despite being a non-neutralizing antibody.



136 In addition to being able to directly neutralize pathogens, antibodies can eliminate  
137 infection through FcR-mediated reactions, such as ADCC or ADCP [12]. Because 651 was  
138 unable to neutralize the influenza virus, we next examined whether the protective efficacy of  
139 651 was due to FcR-mediated effector functions. We generated an Fc-region mutant with  
140 leucine 234 and 235 to alanine substitutions, called 651-LALA, which mitigates antibody  
141 effector function by abolishing antibody binding to the FcR [24]. We found that mice given  
142 651-LALA had similar mortality rates as those pretreated with PBS (Fig 2G), demonstrating  
143 the significance of the effector function of 651. The  $\gamma$  chain of the Fc receptor is a critical  
144 component of the high-affinity receptor for IgG [15]. Mice lacking the FcR  $\gamma$  chain displayed  
145 impaired NK-cell-mediated ADCC and macrophage-mediated ADCP [25]. Significantly  
146 reduced survival rates were also found in 651-pretreated *Fcer1g*-knockout mice compared  
147 with 651-pretreated wildtype mice after Cal/09 infection (Fig 2H). However, a lack of *Fcer1g*  
148 did not abolish the protective effect of F10, indicating that neutralizing activity predominantly  
149 contributed to the function of F10 (Fig 2H). Following challenge with a lethal dose of Cal/09  
150 virus, mice pretreated with 651-LALA or *Fcer1g*-knockout mice consistently showed similar  
151 dramatic bodyweight loss as the PBS treated group (S2E and S2F Fig). Together these results  
152 indicate that the protective effects mediated by 651 rely on FcR-mediated effector functions.

153

154 **651-pretreatment alleviates virus replication and ameliorates lung inflammation**

155 Upon influenza viral infection, both virus-induced virulence and immunopathology contribute  
156 to inflammation and tissue injury in the respiratory tract [26]. We next examined whether 651  
157 leads to viral clearance and alleviates lung inflammation. Virus replication was abolished in  
158 mice pretreated with F10 2 h before Cal09 infection by 3 days post infection, which is likely  
159 to be due to the potent influenza-virus-neutralizing ability of F10 (Fig 3A). Notably, a  
160 significant improvement in viral clearance was seen on day 5, but not day 3, in Cal09-infected  
161 mice pretreated with 651 (Fig 3A). Hematoxylin and eosin (H&E) staining further showed the  
162 reduced pulmonary edema and immune cell infiltration in mice pretreated with F10 or 651.  
163 However, mice treated with 651-LALA displayed lung damage and immune cell infiltration as  
164 severe as that seen in PBS-treated mice on day 3 after Cal09 infection (Fig 3B).

165 The viral nucleic acids released upon influenza virus infection can be sensed by various  
166 pattern-recognition receptors, which trigger robust downstream signaling [27, 28]. Several  
167 cytokines in the lungs, including the type I IFN, MCP-1, IL-6, and TNF $\alpha$  produced by various  
168 cells after influenza infection, lead to cytokine storms—one of the major causes of severe  
169 flu-associated complications [27]. We next assessed whether the production of cytokines in  
170 the lungs is influenced by 651 administration. We found that the production of cytokines,  
171 including IFN $\alpha$ , IFN $\beta$ , MCP-1, IL-6, and TNF $\alpha$ , was elevated on days 3 and 5 after Cal/09  
172 infection (Fig 3D and 3E). Pretreatment with F10 or 651 significantly reduced the release of  
173 all cytokines on day 3 (Fig 3D). At 5 days post infection, the production of IFN $\beta$ , MCP-1, and

174 IL-6 remained significantly reduced by pretreatment with F10 or 651 (Fig 3E). Type III IFN,  
175 IFN $\lambda$ , has been shown to have therapeutic efficacy against the influenza virus, but it does not  
176 induce proinflammatory **side** effects [29]. It is noteworthy that the IFN $\lambda$  level was elevated in  
177 mice pretreated with F10 or 651 on day 3 post infection (**Fig 3D**). The 651-mediated  
178 reduction of cytokine production was reverted when Leu234/Leu235 sites were mutated (Fig  
179 3D and 3E). Therefore, **similarly to pretreatment with F10, pretreatment with 651 alleviated**  
**180 lung inflammation after influenza virus challenge.**

181

#### 182 **ADCC and ADCP mediated by 651**

183 The HA of influenza virus was reported to be the antigenic determinant responsible for the  
184 generation of antibodies with ADCC [30]. Several immune cell types, including NK cells and  
185 neutrophils, target antibody-labeled cells after infection and release cytotoxic granules and  
186 cytokines to kill the virus-infected cells [31]. Following Cal/09 challenge, the percentage of  
187 NK cells, defined as CD49b<sup>+</sup>CD3e<sup>-</sup>, in the lungs increased on day 3 (Fig 4A) but then  
188 declined to a level similar to that in uninfected mice on day 5 (Fig 4B). We found an increased  
189 NK cell population in the lungs on day 5 post infection in F10- and 651-, but not in  
190 651-LALA-, pretreated mice (**Fig 4A and 4B**), suggesting the **potential role of NK cells in**  
**191 mice provided with protective antibody treatment.** Furthermore, we used HEK293T cells to  
192 express HA proteins from various strains of influenza virus, including Bri/09 H1N1, Cal/09

193 H1N1, H3N2, and H7N9, to examine whether 651 provided ADCC *in vitro*. Compared with  
194 the effects in the control IgG-treated cells, both 651 and FI6 showed greater dose-dependent  
195 cytotoxicity towards cells expressing Bris/07, Cal/09, and H3 (Fig 4C), but 651 did not  
196 provide ADCC against H7-expressing cells (Fig 4C). This is consistent with our data showing  
197 the lack of binding to H7 by 651 (Fig 1B). Since ADCC relies on the Fc-FcR interaction,  
198 651-LALA could not trigger effective ADCC against Bris/07 and Cal/09 HA (Fig 4D).

199 Besides ADCC, ADCP also contributes to protection against influenza virus infection.  
200 Non-neutralizing antibodies have been shown to offer protective effects through alveolar  
201 macrophages but not NK cells [32]. We found that on days 3 and 5 after Cal/09 challenge, the  
202 frequency of alveolar macrophages significantly declined (Fig 4E and 4F), which is consistent  
203 with a previous report showing that alveolar macrophages dramatically diminished in  
204 BLAB/c mice after influenza virus infection [33]. Pretreatment with F10 or 651 significantly  
205 rescued the decline of alveolar macrophages caused by influenza virus infection on days 3 and  
206 5 post infection (Fig 4E and 4F). We subsequently used THP-1 as effector cells to confirm  
207 whether 651 utilizes ADCP for influenza virus clearance *in vitro*. The antibody opsonized  
208 Cal/09 virus was incubated with sialidase-treated THP-1 cells, and intracellular viral N  
209 protein (NP) was detected. We found that the uptake of viruses by THP-1 cells was  
210 accelerated by opsonized 651 (Fig 4G) compared with uptake by the IgG- and  
211 651-LALA-opsonized group. Moreover, a dose-dependent ADCP by 651 was observed (Fig

212 4H). ADCP activity was not found for various doses of 651-LALA opsonized with Cal/09  
213 (Fig 4G and 4H). Therefore, we demonstrated that 651 possesses ADCC and ADCP activity *in*  
214 *vitro*.

215

## 216 **NK cells and alveolar macrophages coordinate the antiviral responses mediated by 651**

217 Having demonstrated the ADCC and ADCP mediated by 651 *in vitro*, we next examined the  
218 involvement of NK cells and alveolar macrophages in 651-mediated protection during virus  
219 challenge *in vivo*. Mice were administered an anti-ASGM1 antibody to deplete NK cells (S3A  
220 Fig) and intranasally administered clodronate liposomes to deplete alveolar macrophages  
221 (S3A Fig). As expected, both F10 and 651 still possessed prophylactic activity in  
222 Cal/09-infected mice injected with the control antibody or liposomes, as shown by the  
223 significantly improved survival (Fig 5A). Remarkably, the prophylactic effects of 651  
224 diminished when NK cells and alveolar macrophages were co-depleted (Fig 5B), while 651  
225 still protected mice lacking either NK cells or alveolar macrophages. In contrast,  
226 F10-administered mice remained resistant to influenza virus challenge, even when NK cells  
227 and alveolar macrophages were co-depleted (Fig 5B), implying the predominant neutralizing  
228 activity of F10 [23]. The body weight loss results demonstrated that the co-depletion of NK  
229 cells and alveolar macrophages was required to eradicate the protective effect of 651 (S3B  
230 and S3C Fig). Consistently, the production of IFN- $\beta$  and proinflammatory cytokines, such as

231 IL-6 and MCP-1, in the lungs was comparable between the 651- and PBS-pretreated mice  
232 co-depleted with NK cells and alveolar macrophages on day 3 (Fig 5C) and day 5 (Fig 5D)  
233 post infection. The viral titers on day 5 post infection were also similar between the PBS- and  
234 651-pretreated mice co-depleted with NK cells and alveolar macrophages (Fig 5E). These  
235 results suggest that the protective efficacy of 651 *in vivo* could be attributed to both NK cells  
236 and alveolar macrophages.

237 From our study, we concluded that 651 is a non-neutralizing mAb with a broad spectrum  
238 of recognition range that is able to alleviate the inflammatory responses and ameliorate the  
239 mortality associated with influenza viral infection. This broad-spectrum mAb was isolated  
240 from HA<sub>mg</sub>-immunized mice. It remains to be ascertained if a natural influenza viral infection  
241 or influenza vaccination in humans can elicit a significant abundance of such  
242 broad-recognition and non-neutralizing anti-HA antibodies that confer protection through  
243 effector functions. One recent study demonstrated the antibody-dependent enhancement of  
244 influenza virus infection involved the recognition of the head domain and the promotion of  
245 viral fusion [34]. Studying the structure of HA, 651, and the FcR tertiary complex will further  
246 reveal the allosteric preferences of engaging target cells and effector cells for effective ADCC.  
247 Nevertheless, the Fab of 651 recognizes the globular head region, near the glycan  
248 modification sites of HA, whose sequences are conserved in Bris/07 and Cal/09. We consider  
249 that removal or truncation of the glycan may allow the exposure of hidden epitopes of HA

250 that are relatively conserved across influenza viruses.

251         Accumulating efforts have improved the potency of antibody-mediated effector functions  
252 by generating Fc variants or modulating the glycan compositions of Fc [35-37]. Further  
253 modifications of 651 may optimize its protection efficacy *in vivo*. We found that, in addition  
254 to NK-cell-mediated ADCC, alveolar macrophage-mediated ADCP is also critical to the  
255 protective effects of 651. In response to viral infections, alveolar macrophages are activated,  
256 becoming phagocytic and producing large quantities of inflammatory cytokines, including  
257 type I IFNs [38]. Some mAbs have been demonstrated to confer protection against influenza  
258 viral infection through the action of antibody-induced inflammation and ADCP mediated by  
259 alveolar macrophages [32]. However, neither F10 nor 651 increased the production of  
260 inflammatory cytokines in the lungs during influenza virus infection, possibly because of the  
261 differential cytokine kinetics resulting from the different doses and types of virus used.  
262 Although awaiting confirmation in future studies, it is also plausible that the antibody affinity  
263 in this study selectively modulated certain subsets of the heterogeneous alveolar macrophages,  
264 which are, at minimum, composed of resident macrophages that populate the lungs during  
265 embryogenesis and circulating blood monocytes recruited to the lungs following infection  
266 [39].

267         In conclusion, the study described herein revealed the protective effects of a  
268 broad-recognition and non-neutralizing mAb against influenza infection, which may prove

269 valuable in future assessments of vaccine efficacy and therapeutic antibody development.

270

## 271 **Materials and Methods**

### 272 **Influenza viruses, HA expression plasmids and HA proteins**

273 The vaccine strains of influenza viruses A/H1N1/California/07/2009 (Cal/09),  
274 A/H1N1/Brisbane/59/2007 (Bris/07), A/H5N1/Vietnam/1194/2004/NIBRG14 (NIBRG14)  
275 and A/H3N2/Victoria/361/2011 (Vic/11) were from the reference collection of the National  
276 Institute for Biological Standards and Control. All viruses were inoculated into the allantoic  
277 cavities of 10-d-old specific pathogen-free embryonated chicken eggs for 2 days at 35°C. The  
278 50% tissue culture infective dose (TCID<sub>50</sub>) of viruses in Madin-Darby canine kidney (MDCK)  
279 (CCL-34; American Type Culture Collection) cells and LD<sub>50</sub> of virus in BALB/c mice were  
280 determined before experiments. Methods for expression and purification of the ectodomains  
281 of HA from Cal/09, Bris/07, NIBRG14, Vic/11, A/H1N1/WSN/1933 (WSN), A/H1N1/Puerto  
282 Rico/8/1934 (PR8), A/H7N9/Shanghai/2/2013, and B/Victoria/2/87 were described previously  
283 [20]. Methods for generation and purification of stem region of HA from Bris/07 as well as  
284 HA<sub>mg</sub> and HA<sub>fg</sub> from Cal/09 and Bris/07 were described previously [21, 40].

285

### 286 **Flow cytometry**

287 To determine the immune cell subsets in lungs of infected mice, whole lung tissues were



288 removed, followed by isolation of single cell suspensions using the lung dissociation kit  
289 (Miltenyi Biotec). Cells were harvested and suspended in FACS buffer (2% FBS in PBS) at a  
290 density of  $10^6$ /ml. The antibodies used in this study are anti-mouse B220 antibody (BD, clone  
291 RA3-6B2), anti-mouse IgG1 antibody (BD, clone X56), anti-mouse CD38 antibody  
292 (Biolegend, clone 90), anti-mouse CD45 antibody (BD, clone 30-F11), anti-mouse CD49b  
293 antibody (Biolegend, clone DX5), anti-mouse CD3e antibody (BD, clone 145-2c11),  
294 anti-mouse Siglec-F antibody (BD, clone E50-2440), anti-mouse CD64 antibody (BD, clone  
295 X54-5/7.1), anti-mouse CD11b antibody (BD, clone M1/70), and anti-mouse CD11c antibody  
296 (Biolegend, clone N418). Cellular fluorescence intensity was analyzed by FACSCanto (BD  
297 Biosciences) and FCS Express 3.0 software.

298

### 299 **Cloning and expression of HA-specific mAbs**

300 Ig genes from a single B cell were isolated primarily following the protocols reported  
301 previously [21, 41, 42]. Briefly, single cell was collected from the spleens of BALB/c mice  
302 immunized i.m. two times at 2 weeks apart with 20  $\mu$ g Bris/07 HA<sub>fg</sub> or HA<sub>mg</sub>. The  
303 HA<sub>fg</sub><sup>+</sup>B220<sup>+</sup>IgG1<sup>+</sup>CD38<sup>+</sup> splenic B cells were isolated on day 29 by a cell sorter (FACS Aria  
304 II), and the single B cell was sorted into 96-well PCR plates (Thermal Scientific). RT-PCR  
305 reactions were performed as described previously [21, 41, 42]. Aliquots of nested PCR  
306 products were sequenced and analyzed using IMGT/V-Quest (<http://www.imgt.org>) to

307 identify the highest homology gene loci of germ-line V, D, and J genes. Those candidate Ig  
308 heavy- and light-chain cDNA segments were further subcloned to a chimeric Ig expression  
309 vector modified from the tandem chimeric antibody expression (TCAE) vector and the  
310 pIgG1( $\kappa$ ) vector (provided by Dr. T. W. Chang, Genomics Research Center, Academia Sinica,  
311 Taipei, Taiwan). The generation of the mutations at Fc region of mAb 651,  
312 Leu234Ala/Leu235Ala (LALA), was performed by substituting two leucine (L) residues with  
313 alanine (A) at a.a. 234 and 235 through site-directed mutagenesis of cDNA. The positive  
314 control of anti-HA antibodies FI6 [6] and F10 [23] were expressed and purified following  
315 previously described procedures [43].

316

### 317 **Purification and binding efficacy of recombinant mAbs**

318 Ig expression vector was transfected into HEK293F cells by using Expi293<sup>TM</sup> Expression  
319 System Kit (Thermo Fisher Scientific). Three days later, supernatant was collected for  
320 antibody purification by using Protein A Sepharose (GE) chromatography. Antibody was  
321 dissolved in PBS. Enzyme-linked immunosorbent assay (ELISA) was used to determine the  
322 binding of recombinant mAbs with HA. Briefly, purified HA of Cal/09, Bris/07, WSN/33,  
323 PR8/34, H3, H5, H7 and Flu B viruses was coated on the 96-well plates (0.1  $\mu$ g/well in 100  
324  $\mu$ L) for 2 h. The HA-coated plates were then incubated with the 2-fold serial dilutions of  
325 recombinant mAbs starting from the highest concentration at 0.05  $\mu$ g/mL for 2 h. The

326 captured recombinant antibodies were detected by HRP-conjugated anti-human antibodies  
327 and peroxidase substrate solution substrate (BD Biosciences). The OD was read by the  
328 SpectraMax M2 Microplate Reader (Molecular Devices). The bio-layer interferometry (BLI)  
329 was performed on Octet RED 96 instrument (FortéBio, Inc.). Antibody was immobilized onto  
330 anti-human AHC biosensors (FortéBio, Inc.) and incubated with HAs at 0.013–3.17  $\mu$ M for  
331 90 seconds for association and then incubated in 20 mM Tris, pH 8.0, 150 mM NaCl, 0.005%  
332 Tween 20 for dissociation for 90 seconds. The signals for each binding event were measured  
333 with a 1:1 Langmuir binding model for  $k_{on}$ ,  $k_{off}$  and  $K_d$  value determination.

334

### 335 **Microneutralization assay**

336 Microneutralization assay was performed as previously described [37]. The freshly prepared  
337 virus was quantified with the median TCID<sub>50</sub>. The 10-fold TCID<sub>50</sub> of virus was mixed in  
338 equal volume with 2-fold serial dilutions of mAbs in 96-well plates and incubated for 1 h at  
339 37 °C. The mixture was added onto the MDCK cells ( $1.5 \times 10^4$  cells per well) in the plates  
340 followed by incubation at 37 °C for 16-20 h. The cells were washed with PBS, fixed in  
341 acetone/methanol solution (1:1 vol/vol), and blocked with 5% (wt/vol) skim milk in PBS.  
342 Quantification of virus was detected by ELISA with a polyclonal antibody against influenza  
343 A nucleoprotein (NP) protein. The anti-NP primary antibody was added and incubated for 1 h  
344 at 37 °C. After washing with PBST (PBS + 0.01% Tween 20), the secondary antibody (rabbit

345 anti-goat IgG HRP conjugated) was added and incubated for 1 h at 37 °C. Peroxidase  
346 substrate solution was then added and incubated for 15 min at room temperature in the dark,  
347 followed by adding stop solution. The absorbance (OD) of the wells was read at 450/620 nm.

348

#### 349 **Hemagglutination inhibition assay (HI) assay**

350 The hemagglutination units of Cal/09 virus were determined following a previous report [21].  
351 Briefly, the 2-fold serial dilutions of Cal/09 virus were added into the 96-well round (U)  
352 bottom plates, and 0.2% turkey red blood cells (Jianrong Farm, Taiwan) were added into each  
353 well and mixed well. After 30 min, the hemagglutination unit (HAU) was identified. For  
354 antibody mediated hemagglutination inhibition detection, 1024 HAU of Cal/09 virus was  
355 mixed with 2-fold serial dilutions of mAbs and incubated for 30 min. After incubation, 0.2%  
356 turkey red blood cells were added into each well and mixed well. After 30 min, the  
357 hemagglutination inhibition was determined.

358

#### 359 **Virus challenge in mice**

360 Female BALB/c mice, purchased from National Laboratory Animal Center, Taiwan, at 8 wk  
361 old were injected i.p. with 300 µg (15 mg/kg) or 150 µg (7.5 mg/kg) purified mAb 2 h before  
362 or 24 h after intranasal challenge with H1N1 Bris/07 or Cal/09 virus with a lethal dose (100  
363 LD50). In some experiments, FcγR knockout mice (purchased from The Jackson Laboratory)

364 at 8 wk old were used. Mouse body weight and survival data were measured and recorded  
365 every day afterwards. In some experiments, NK cells were depleted by anti-ASGM1 (50  
366  $\mu\text{L}/\text{mouse}$ , WAKO) antibody or PBS (as the control) by ip injection 2 d before mAb injection.  
367 Macrophages were depleted by clodronate liposomes (100  $\mu\text{L}/\text{mouse}$ , ClodronateLiposomes)  
368 2 and 4 d before mAb injection. All animal experiments were evaluated and approved by the  
369 Institutional Animal Care and Use Committee of Academia Sinica.

370

#### 371 **ADCC assay**

372 ADCC was performed as previously reported [37]. HEK293T cells transfected with  
373 HA-expression vectors (Bris/07, Cal/09, H3, and H7) for 48 h and human peripheral blood  
374 mononuclear cells (PBMCs) were used as target cells and effector cells, respectively. Human  
375 PBMCs from healthy donors were obtained from Taipei Blood Center with the consent  
376 procedures approved by the Academia Sinica Research Ethics Committee. PBMCs were  
377 isolated by density gradient centrifugation with Ficoll-Paque at  $400\times g$  for 30 min without  
378 brake at  $22^{\circ}\text{C}$ . mAbs at 2-fold serial dilutions were added to the co-culture composed of  
379  $5\times 10^3$  293T cells transiently expressing HA proteins from indicated strains of influenza  
380 viruses and  $2.5\times 10^5$  effector PBMCs (E:T ratio= 50), and incubated for 5 h at  $37^{\circ}\text{C}$ . The  
381 supernatant of the co-culture was collected and analyzed by CytoTox 96 Non-Radioactive  
382 Cytotoxicity Assay Kit (Promega).

383

384 **ADCP assay**

385 ADCP was performed essentially as a previous report [44]. Briefly, Cal/09 virus was  
386 incubated with indicated antibodies at 37 °C for 1 h and added to the sialidase (0.5 unit/mL,  
387 Sigma) pre-treated THP-1 cells (from ATCC). After 1 h incubation, THP-1 cells were washed  
388 three times with RPMI and incubated at 37 °C. After 6 h incubation, THP-1 cells were fixed  
389 in 4% paraformaldehyde, permeabilized and stained with anti-influenza NP antibody (Abcam,  
390 Ab20921, 1:100 dilution). The levels of phagocytosis were monitored by flow cytometry.

391

392 **Histology analysis, cytokine levels and viral titers in lung analysis**

393 The perfused mouse lungs isolated at day 3 and day 5 after infection were fixed in 4%  
394 formaldehyde, embedded in paraffin and cut into 3 µm-thick sections for Hematoxylin &  
395 Eosin (H&E) staining. To determine the viral titers in the infected lungs, infected mice were  
396 sacrificed on day 3 and day 5 post-infection. The whole lungs were collected and  
397 homogenized in PBS (2.5 ml/g lung). The viral titers from the homogenates were determined  
398 by immunoplaque assay on MDCK cells following previously established protocols [45].  
399 Briefly, MDCK cells were seeded into 24-well plates. One day later, the MDCK monolayers  
400 were washed once with PBS. Ten-fold serial dilutions of lung homogenates, made in in  
401 serum-free RPMI containing 0.5 µg/mL TPCK-trypsin, were added to the MDCK cells. After

402 1 h incubation, the cells were washed once with PBS and overlaid with DMEM containing 0.5  
403  $\mu\text{g}/\text{mL}$  TPCK-trypsin and 0.5% agarose. After overnight incubation, MDCK cells were fixed  
404 with 10% formaldehyde and the agarose were removed. The cells were fixed, permeabilized  
405 and stained with anti-influenza NP antibody and the focus forming units were determined.  
406 The lung homogenates were used for determining the levels of cytokines by using IFN- $\beta$  and  
407 IFN- $\alpha$  ELISA kits from PBL Assay Science, MCP-1, IL-6, and TNF- $\alpha$  ELISA kits from  
408 eBioscience, and IFN- $\lambda$ 2/3 ELISA kit from R&D Systems.

409

#### 410 **Hydrogen-Deuterium Exchange-Mass Spectrometry (HDX-MS) Assay**

411 HDX-MS was performed essentially as previously reported [46]. Briefly, the Fab regions of  
412 the antibodies were prepared by using Pierce<sup>TM</sup> Fab Preparation Kit (Thermo). HA protein  
413 (from Bris/07) and Fab region of antibody were co-incubated for 30 min at 37 °C, digested by  
414 PNGase F (NEB) for 2 h at 37 °C. Hydrogen was exchanged to deuterium by adding D<sub>2</sub>O to  
415 the reaction for 10 and 20 min at room temperature and stopped the exchange by increasing  
416 urea concentration to 2 M and low temperature (4°C). After pepsin and protease type XIII  
417 digestion, the sample was ready for MALDI TOF analysis with ESI mass spectrometry (Velos  
418 Pro LTQ, Thermo Scientific, mass spectrometric core facility, Genomics Research Center,  
419 Academia Sinica) to determine the interacting region between HA and Fab.

420

421 **Statistical analysis**

422 Data are shown as the mean  $\pm$  SEM. Statistical analyses were performed using GraphPad  
423 Prism 8 software. Analysis of differences between two groups was performed by an unpaired  
424 two-tailed Student's t test. Comparisons between multiple groups were performed using a  
425 one-way ANOVA, followed by Dunnetts' honestly significant difference post hoc test.  
426 Survival rate differences between groups were analyzed by using log-rank (Mantel-Cox) test.

427

428 **Online supplemental material**

429 S1 Fig shows the *in vitro* characterizations of mAb 651-binding to HA.

430 S2 Fig shows the weight changes of mice pretreated or post-treated with mAbs, followed by  
431 influenza virus infection.

432 S3 Fig shows the depletion efficiency of NK cells and alveolar macrophages (AMs), and the  
433 weight changes of mice depleted with AMs and/or NK cells after mAb pretreatment and  
434 Cal/09 virus challenge.

435

436 **Author contributions**

437 K.-I Lin conceived the study. Y.-A. Ko, Y.-H. Yu, Y.-F. Wu, Y.-C. Tseng, C.-L. Chen, K.-S. G.,  
438 H.-Y. Liao, and T.-H. Chen performed the experiments and data analysis. T.-J. R. Cheng, A.-S.  
439 Yang, C.-H. Wong, and C. Ma provided critical reagents and analytic tools. Y.-A. Ko, Y.-H.



440 Yu and K.-I Lin contributed to writing and revising the manuscript.

441

442 **Acknowledgments**

443 We thank Shii-Yi Yang and Szu-Teng Ma for excellent technical support. This work was

444 supported by grants from Academia Sinica (AS-SUMMIT-109, AS-IA-107-L05), Taiwan, and

445 Ministry of Science and Technology (MOST 109-2320-B-001-023-MY3).

446

447 **Conflicts of interest:** The authors have declared that no conflicts of interest exist.

448

449

450 **References**

- 451 1. Lambert LC, Fauci AS. Influenza vaccines for the future. *N Engl J Med.*  
452 2010;363(21):2036-44. doi: 10.1056/NEJMra1002842. PubMed PMID: 21083388.
- 453 2. Girard MP, Cherian T, Pervikov Y, Kieny MP. A review of vaccine research and  
454 development: human acute respiratory infections. *Vaccine.* 2005;23(50):5708-24. Epub  
455 2005/09/13. doi: S0264-410X(05)00718-8 [pii]  
456 10.1016/j.vaccine.2005.07.046. PubMed PMID: 16154667.
- 457 3. Ostrand-Rosenberg S, Grusby MJ, Clements VK. Cutting edge: STAT6-deficient mice  
458 have enhanced tumor immunity to primary and metastatic mammary carcinoma. *J Immunol.*  
459 2000;165(11):6015-9.
- 460 4. McElhaney JE. Influenza vaccine responses in older adults. *Ageing research reviews.*  
461 2011;10(3):379-88. doi: 10.1016/j.arr.2010.10.008. PubMed PMID: 21055484; PubMed  
462 Central PMCID: PMC3061971.
- 463 5. Dugan HL, Henry C, Wilson PC. Aging and influenza vaccine-induced immunity. *Cell*  
464 *Immunol.* 2020;348:103998. doi: 10.1016/j.cellimm.2019.103998. PubMed PMID:  
465 31733824.
- 466 6. Corti D, Voss J, Gamblin SJ, Codoni G, Macagno A, Jarrossay D, et al. A neutralizing  
467 antibody selected from plasma cells that binds to group 1 and group 2 influenza A  
468 hemagglutinins. *Science.* 2011;333(6044):850-6. doi: 10.1126/science.1205669. PubMed

469 PMID: 21798894.

470 7. Ekiert DC, Kashyap AK, Steel J, Rubrum A, Bhabha G, Khayat R, et al.  
471 Cross-neutralization of influenza A viruses mediated by a single antibody loop. *Nature*.  
472 2012;489(7417):526-32. doi: 10.1038/nature11414. PubMed PMID: 22982990; PubMed  
473 Central PMCID: PMC3538848.

474 8. McCarthy KR, Watanabe A, Kuraoka M, Do KT, McGee CE, Sempowski GD, et al.  
475 Memory B Cells that Cross-React with Group 1 and Group 2 Influenza A Viruses Are  
476 Abundant in Adult Human Repertoires. *Immunity*. 2018;48(1):174-84 e9. doi:  
477 10.1016/j.immuni.2017.12.009. PubMed PMID: 29343437; PubMed Central PMCID:  
478 PMC5810956.

479 9. Lee J, Boutz DR, Chromikova V, Joyce MG, Vollmers C, Leung K, et al. Molecular-level  
480 analysis of the serum antibody repertoire in young adults before and after seasonal influenza  
481 vaccination. *Nat Med*. 2016;22(12):1456-64. doi: 10.1038/nm.4224. PubMed PMID:  
482 27820605; PubMed Central PMCID: PMC5301914.

483 10. Bangaru S, Lang S, Schotsaert M, Vandervan HA, Zhu X, Kose N, et al. A Site of  
484 Vulnerability on the Influenza Virus Hemagglutinin Head Domain Trimer Interface. *Cell*.  
485 2019;177(5):1136-52 e18. doi: 10.1016/j.cell.2019.04.011. PubMed PMID: 31100268;  
486 PubMed Central PMCID: PMC6629437.

487 11. Murin CD, Wilson IA, Ward AB. Antibody responses to viral infections: a structural

488 perspective across three different enveloped viruses. *Nature microbiology*. 2019;4(5):734-47.  
489 doi: 10.1038/s41564-019-0392-y. PubMed PMID: 30886356; PubMed Central PMCID:  
490 PMC6818971.

491 12. Krammer F. The human antibody response to influenza A virus infection and vaccination.  
492 *Nat Rev Immunol*. 2019;19(6):383-97. doi: 10.1038/s41577-019-0143-6. PubMed PMID:  
493 30837674.

494 13. Dong J, Gilchuk I, Li S, Irving R, Goff MT, Turner HL, et al. Anti-influenza H7 human  
495 antibody targets antigenic site in hemagglutinin head domain interface. *J Clin Invest*. 2020.  
496 doi: 10.1172/JCI136032. PubMed PMID: 32749241.

497 14. Von Holle TA, Moody MA. Influenza and Antibody-Dependent Cellular Cytotoxicity.  
498 *Frontiers in immunology*. 2019;10:1457. doi: 10.3389/fimmu.2019.01457. PubMed PMID:  
499 31316510; PubMed Central PMCID: PMC6611398.

500 15. Nimmerjahn F, Ravetch JV. Fcγ receptors as regulators of immune responses. *Nat*  
501 *Rev Immunol*. 2008;8(1):34-47. doi: 10.1038/nri2206. PubMed PMID: 18064051.

502 16. DiLillo DJ, Tan GS, Palese P, Ravetch JV. Broadly neutralizing hemagglutinin  
503 stalk-specific antibodies require FcγR interactions for protection against influenza virus  
504 in vivo. *Nat Med*. 2014;20(2):143-51. doi: 10.1038/nm.3443. PubMed PMID: 24412922;  
505 PubMed Central PMCID: PMC3966466.

506 17. Huber VC, Lynch JM, Bucher DJ, Le J, Metzger DW. Fc receptor-mediated phagocytosis

507 makes a significant contribution to clearance of influenza virus infections. *J Immunol.*  
508 2001;166(12):7381-8. doi: 10.4049/jimmunol.166.12.7381. PubMed PMID: 11390489.

509 18. Bajic G, Maron MJ, Adachi Y, Onodera T, McCarthy KR, McGee CE, et al. Influenza  
510 Antigen Engineering Focuses Immune Responses to a Subdominant but Broadly Protective  
511 Viral Epitope. *Cell Host Microbe.* 2019;25(6):827-35 e6. doi: 10.1016/j.chom.2019.04.003.  
512 PubMed PMID: 31104946; PubMed Central PMCID: PMC6748655.

513 19. Tseng YC, Wu CY, Liu ML, Chen TH, Chiang WL, Yu YH, et al. Egg-based influenza  
514 split virus vaccine with monoglycosylation induces cross-strain protection against influenza  
515 virus infections. *Proc Natl Acad Sci U S A.* 2019;116(10):4200-5. doi:  
516 10.1073/pnas.1819197116. PubMed PMID: 30782805; PubMed Central PMCID:  
517 PMC6410868.

518 20. Wang CC, Chen JR, Tseng YC, Hsu CH, Hung YF, Chen SW, et al. Glycans on influenza  
519 hemagglutinin affect receptor binding and immune response. *Proc Natl Acad Sci U S A.*  
520 2009;106(43):18137-42. Epub 2009/10/14. doi: 0909696106 [pii]  
521 10.1073/pnas.0909696106. PubMed PMID: 19822741; PubMed Central PMCID:  
522 PMC2775302.

523 21. Chen JR, Yu YH, Tseng YC, Chiang WL, Chiang MF, Ko YA, et al. Vaccination of  
524 monoglycosylated hemagglutinin induces cross-strain protection against influenza virus  
525 infections. *Proc Natl Acad Sci U S A.* 2014;111(7):2476-81. doi: 10.1073/pnas.1323954111.

526 PubMed PMID: 24469815; PubMed Central PMCID: PMC3932897.

527 22. Krause JC, Crowe JE, Jr. Committing the Oldest Sins in the Newest Kind of  
528 Ways-Antibodies Targeting the Influenza Virus Type A Hemagglutinin Globular Head.  
529 *Microbiol Spectr.* 2014;2(5). doi: 10.1128/microbiolspec.AID-0021-2014. PubMed PMID:  
530 26104373.

531 23. Sui J, Hwang WC, Perez S, Wei G, Aird D, Chen LM, et al. Structural and functional  
532 bases for broad-spectrum neutralization of avian and human influenza A viruses. *Nat Struct*  
533 *Mol Biol.* 2009;16(3):265-73. doi: 10.1038/nsmb.1566. PubMed PMID: 19234466; PubMed  
534 Central PMCID: PMC2692245.

535 24. Chappel MS, Isenman DE, Everett M, Xu YY, Dorrington KJ, Klein MH. Identification  
536 of the Fc gamma receptor class I binding site in human IgG through the use of recombinant  
537 IgG1/IgG2 hybrid and point-mutated antibodies. *Proc Natl Acad Sci U S A.*  
538 1991;88(20):9036-40. doi: 10.1073/pnas.88.20.9036. PubMed PMID: 1833770; PubMed  
539 Central PMCID: PMC52646.

540 25. Takai T, Li M, Sylvestre D, Clynes R, Ravetch JV. FcR gamma chain deletion results in  
541 pleiotropic effector cell defects. *Cell.* 1994;76(3):519-29. doi:  
542 10.1016/0092-8674(94)90115-5. PubMed PMID: 8313472.

543 26. Herold S, Becker C, Ridge KM, Budinger GR. Influenza virus-induced lung injury:  
544 pathogenesis and implications for treatment. *Eur Respir J.* 2015;45(5):1463-78. doi:

545 10.1183/09031936.00186214. PubMed PMID: 25792631.

546 27. Guo XJ, Thomas PG. New fronts emerge in the influenza cytokine storm. *Semin*  
547 *Immunopathol.* 2017;39(5):541-50. doi: 10.1007/s00281-017-0636-y. PubMed PMID:  
548 28555383; PubMed Central PMCID: PMC5580809.

549 28. Iwasaki A, Pillai PS. Innate immunity to influenza virus infection. *Nat Rev Immunol.*  
550 2014;14(5):315-28. doi: 10.1038/nri3665. PubMed PMID: 24762827; PubMed Central  
551 PMCID: PMC4104278.

552 29. Davidson S, McCabe TM, Crotta S, Gad HH, Hessel EM, Beinke S, et al. IFNlambda is  
553 a potent anti-influenza therapeutic without the inflammatory side effects of IFNalpha  
554 treatment. *EMBO Mol Med.* 2016;8(9):1099-112. doi: 10.15252/emmm.201606413. PubMed  
555 PMID: 27520969; PubMed Central PMCID: PMC5009813.

556 30. Hashimoto G, Wright PF, Karzon DT. Antibody-dependent cell-mediated cytotoxicity  
557 against influenza virus-infected cells. *J Infect Dis.* 1983;148(5):785-94. doi:  
558 10.1093/infdis/148.5.785. PubMed PMID: 6605395.

559 31. Jegaskanda S, Reading PC, Kent SJ. Influenza-specific antibody-dependent cellular  
560 cytotoxicity: toward a universal influenza vaccine. *J Immunol.* 2014;193(2):469-75. doi:  
561 10.4049/jimmunol.1400432. PubMed PMID: 24994909.

562 32. He W, Chen CJ, Mullarkey CE, Hamilton JR, Wong CK, Leon PE, et al. Alveolar  
563 macrophages are critical for broadly-reactive antibody-mediated protection against influenza

564 A virus in mice. *Nat Commun.* 2017;8(1):846. doi: 10.1038/s41467-017-00928-3. PubMed  
565 PMID: 29018261; PubMed Central PMCID: PMC5635038.

566 33. Califano D, Furuya Y, Metzger DW. Effects of Influenza on Alveolar Macrophage  
567 Viability Are Dependent on Mouse Genetic Strain. *J Immunol.* 2018;201(1):134-44. doi:  
568 10.4049/jimmunol.1701406. PubMed PMID: 29760191; PubMed Central PMCID:  
569 PMC6008236.

570 34. Winarski KL, Tang J, Klenow L, Lee J, Coyle EM, Manischewitz J, et al.  
571 Antibody-dependent enhancement of influenza disease promoted by increase in  
572 hemagglutinin stem flexibility and virus fusion kinetics. *Proc Natl Acad Sci U S A.*  
573 2019;116(30):15194-9. doi: 10.1073/pnas.1821317116. PubMed PMID: 31296560; PubMed  
574 Central PMCID: PMC6660725.

575 35. Lazar GA, Dang W, Karki S, Vafa O, Peng JS, Hyun L, et al. Engineered antibody Fc  
576 variants with enhanced effector function. *Proc Natl Acad Sci U S A.* 2006;103(11):4005-10.  
577 doi: 10.1073/pnas.0508123103. PubMed PMID: 16537476; PubMed Central PMCID:  
578 PMC1389705.

579 36. Li T, DiLillo DJ, Bournazos S, Giddens JP, Ravetch JV, Wang LX. Modulating IgG  
580 effector function by Fc glycan engineering. *Proc Natl Acad Sci U S A.* 2017;114(13):3485-90.  
581 doi: 10.1073/pnas.1702173114. PubMed PMID: 28289219; PubMed Central PMCID:  
582 PMC5380036.



583 37. Lin CW, Tsai MH, Li ST, Tsai TI, Chu KC, Liu YC, et al. A common glycan structure on  
584 immunoglobulin G for enhancement of effector functions. *Proc Natl Acad Sci U S A.*  
585 2015;112(34):10611-6. doi: 10.1073/pnas.1513456112. PubMed PMID: 26253764; PubMed  
586 Central PMCID: PMC4553773.

587 38. Divangahi M, King IL, Pernet E. Alveolar macrophages and type I IFN in airway  
588 homeostasis and immunity. *Trends Immunol.* 2015;36(5):307-14. doi:  
589 10.1016/j.it.2015.03.005. PubMed PMID: 25843635.

590 39. Kopf M, Schneider C, Nobs SP. The development and function of lung-resident  
591 macrophages and dendritic cells. *Nat Immunol.* 2015;16(1):36-44. doi: 10.1038/ni.3052.  
592 PubMed PMID: 25521683.

593 40. Liao HY, Wang SC, Ko YA, Lin KI, Ma C, Cheng TR, et al. Chimeric hemagglutinin  
594 vaccine elicits broadly protective CD4 and CD8 T cell responses against multiple influenza  
595 strains and subtypes. *Proc Natl Acad Sci U S A.* 2020;117(30):17757-63. Epub 2020/07/17.  
596 doi: 10.1073/pnas.2004783117. PubMed PMID: 32669430; PubMed Central PMCID:  
597 PMCPMC7395492.

598 41. Smith K, Garman L, Wrammert J, Zheng NY, Capra JD, Ahmed R, et al. Rapid  
599 generation of fully human monoclonal antibodies specific to a vaccinating antigen. *Nature*  
600 *protocols.* 2009;4(3):372-84. doi: 10.1038/nprot.2009.3. PubMed PMID: 19247287; PubMed  
601 Central PMCID: PMC2750034.

602 42. Tiller T, Busse CE, Wardemann H. Cloning and expression of murine Ig genes from  
603 single B cells. *Journal of immunological methods*. 2009;350(1-2):183-93. doi:  
604 10.1016/j.jim.2009.08.009. PubMed PMID: 19716372.

605 43. Chen IC, Chiu YK, Yu CM, Lee CC, Tung CP, Tsou YL, et al. High throughput  
606 discovery of influenza virus neutralizing antibodies from phage-displayed synthetic antibody  
607 libraries. *Scientific reports*. 2017;7(1):14455. Epub 2017/11/02. doi:  
608 10.1038/s41598-017-14823-w. PubMed PMID: 29089574; PubMed Central PMCID:  
609 PMC5663709.

610 44. Ana-Sosa-Batiz F, Vanderven H, Jegaskanda S, Johnston A, Rockman S, Laurie K, et al.  
611 Influenza-Specific Antibody-Dependent Phagocytosis. *PLoS One*. 2016;11(4):e0154461.  
612 Epub 2016/04/29. doi: 10.1371/journal.pone.0154461. PubMed PMID: 27124730; PubMed  
613 Central PMCID: PMC4849649.

614 45. Tan GS, Krammer F, Eggink D, Kongchanagul A, Moran TM, Palese P. A pan-H1  
615 anti-hemagglutinin monoclonal antibody with potent broad-spectrum efficacy in vivo. *J Virol*.  
616 2012;86(11):6179-88. Epub 2012/04/12. doi: 10.1128/JVI.00469-12. PubMed PMID:  
617 22491456; PubMed Central PMCID: PMC3372189.

618 46. Chen HS, Hou SC, Jian JW, Goh KS, Shen ST, Lee YC, et al. Predominant structural  
619 configuration of natural antibody repertoires enables potent antibody responses against  
620 protein antigens. *Scientific reports*. 2015;5:12411. Epub 2015/07/24. doi: 10.1038/srep12411.

621 PubMed PMID: 26202883; PubMed Central PMCID: PMC5378893.

622

623 **Figure Legends**

624 **Figure 1. Generation of 651 from Bris/07 HA<sub>mg</sub>-immunized mice**

625 (A) Bris/07 (H1N1) HA proteins with two types of glycan modifications, HA<sub>fg</sub> (HA carrying  
626 the typical complex type N-glycans) and HA<sub>mg</sub> (HA carrying GlcNAc at N-glycosylation sites  
627 only), were used to immunize mice, followed by isolation of mAbs with a single B cell  
628 screening platform. (B) The resulting recombinant mAb 651 showed cross-recognition of  
629 several strains of group A influenza virus. (C) BLI assay showing 651 possessed a higher  
630 affinity for HA<sub>mg</sub> from Cal/09. (D) Immunoblot of reduced (5% 2-ME in sample buffer) and  
631 non-reduced Bris/07 HA proteins showing 651 recognized the structural epitope of HA. (E)  
632 ELISA showing 651 was unable to recognize the stem region of HA from Bris/07. (F) Effects  
633 of 651 on the microneutralization of various strains of influenza viral infections. FI6 and F10  
634 were used as the positive controls.

635

636 **Figure 2. Prophylactic and therapeutic efficacy of 651 in mice challenged with lethal**  
637 **dose of H1N1**

638 (A-C) Cumulative survival rate of mice treated (i.p.) with indicated mAb 2 h before challenge  
639 with 100 LD50 of H1N1 Bris/07 virus (B) or Cal/09 virus (C). (D-F) Cumulative survival rate  
640 of mice injected (i.p.) with 651 24 h after challenge with 100 LD50 of H1N1 Bris/07 virus (E)  
641 or Cal/09 virus (F). (G) Cumulative survival rate of mice treated with F10, 651, or a mutation

642 of 651 (651-LALA) after challenge with Cal/09 at 100 LD50. (H) Cumulative survival rate of  
643 FcγR knockout (KO) mice and control WT mice after F10 or 651 pretreatment and Cal/09  
644 virus challenge. Data were analyzed by log-rank (Mantel-Cox) test. The statistical  
645 significance was calculated for the differences between PBS control and mAb treated groups  
646 (in B, C, E, F, and G), or between WT and FcγR knockout (KO) mice receiving the same kind  
647 of mAb (in H). Six-8 mice were used per group in each experiment. \*p < 0.05; \*\*p < 0.01;  
648 \*\*\*p < 0.001. N.S. = no significant difference.

649

650 **Figure 3. Pretreatment with 651 reduced viral replication and alleviated lung**  
651 **inflammation after respiratory challenge with Cal/09 virus**

652 (A and B) Fluorescent focus assay showing the viral titers in lungs of various indicated mAb-  
653 or PBS-pretreated mice on day 3 (A) and day 5 (B) after Cal/09 infection. (C) H&E staining  
654 showing the histopathology of lungs in mAb-pretreated mice on day 3 after Cal/09 infection.  
655 Results from two individual mice from each group are shown. Scale bar = 100 μm. (D and E)  
656 Pulmonary IFNα, IFNβ, MCP-1, IL-6, TNFα, and IFNλ2/3 protein levels on day 3 (D) and  
657 day 5 (E) after Cal/09 infection were measured by ELISA using samples from mice receiving  
658 indicated pretreatments. NC represents mice without infection. Results are mean ± SEM. (n =  
659 4-10). \*p < 0.05; \*\*p < 0.01; \*\*\*p < 0.001.

660

661 **Figure 4. 651 possessed ADCC or ADCP against influenza viruses *in vitro***

662 (A and B) FACS analysis showing the percentage of pulmonary NK cells (CD49b<sup>+</sup>) in  
663 CD45<sup>+</sup>CD3e<sup>-</sup>-gated populations in indicated mAb-pretreated mice on day 3 (A) and day 5 (B)  
664 post challenge of Cal09 virus. (C) 651 showed ADCC against H1 (Bris/07 and Cal/09) and  
665 H3 but not H7-expressing 293T cells. (D) 651-LALA mutation abolished ADCC mediated by  
666 651 to kill cells expressing H1 from Bris/07 or Cal/09 viruses. IgG was used as the negative  
667 control in C and D. (E and F) FACS analysis showing the percentage of alveolar macrophages  
668 (AMs) (SiglecF<sup>+</sup>CD64<sup>+</sup>) in CD45<sup>+</sup>CD11b<sup>-</sup>CD11c<sup>+</sup> gate in indicated mAb- or PBS-pretreated  
669 mice on day 3 (E) and day 5 (F) post-challenge with Cal/09 virus. (G) FACS showing the NP  
670 positive signals in sialidase- (0.5 unit/mL) treated THP-1 cells incubated with 651-,  
671 651-LALA-, or IgG- (all at 100 ng/ml) opsonized Cal/09 virus. Percentage of NP positive  
672 cells is indicated. (H) FACS results showing the percentage of NP positive signals in sialidase  
673 treated THP-1 cells incubated with serial doses of 651 or 651-LALA mAbs and Cal/09 virus.  
674 Results are mean ± SEM. (n = 3-9). \*p < 0.05; \*\*p < 0.01; \*\*\*p < 0.001.

675

676 **Figure 5. 651-mediated protection in mice requires both alveolar macrophages and NK**

677 **cells**

678 (A and B) Cumulative survival rate of mice receiving control reagents, including liposome  
679 alone, control antibody, or both (A), or clodronate liposomes or/and anti-ASGM1 antibody (B)

680 prior to i.p. injection of mAbs and 100 LD50 Cal/09 intranasal challenge. (C and D)  
681 Comparison of pulmonary IFN $\beta$ , MCP-1, and IL-6 protein levels measured by ELISA in  
682 alveolar macrophages (AM)-NK co-depleted mice treated with either PBS or 651 on day 3 (C)  
683 and day 5 (D) post-Cal/09 infection. (E) Fluorescent focus assay showing the comparable  
684 influenza virus titers in AM-NK co-depleted mice treated with either PBS or 651 on day 5  
685 after Cal/09 infection. Data in A and B were analyzed by log-rank (Mantel-Cox) test. Data in  
686 C-E are mean  $\pm$  SEM. (n = 4-12). \*p < 0.05; \*\*p < 0.01; \*\*\*p < 0.001. N.S. = no significant  
687 difference.

688

689

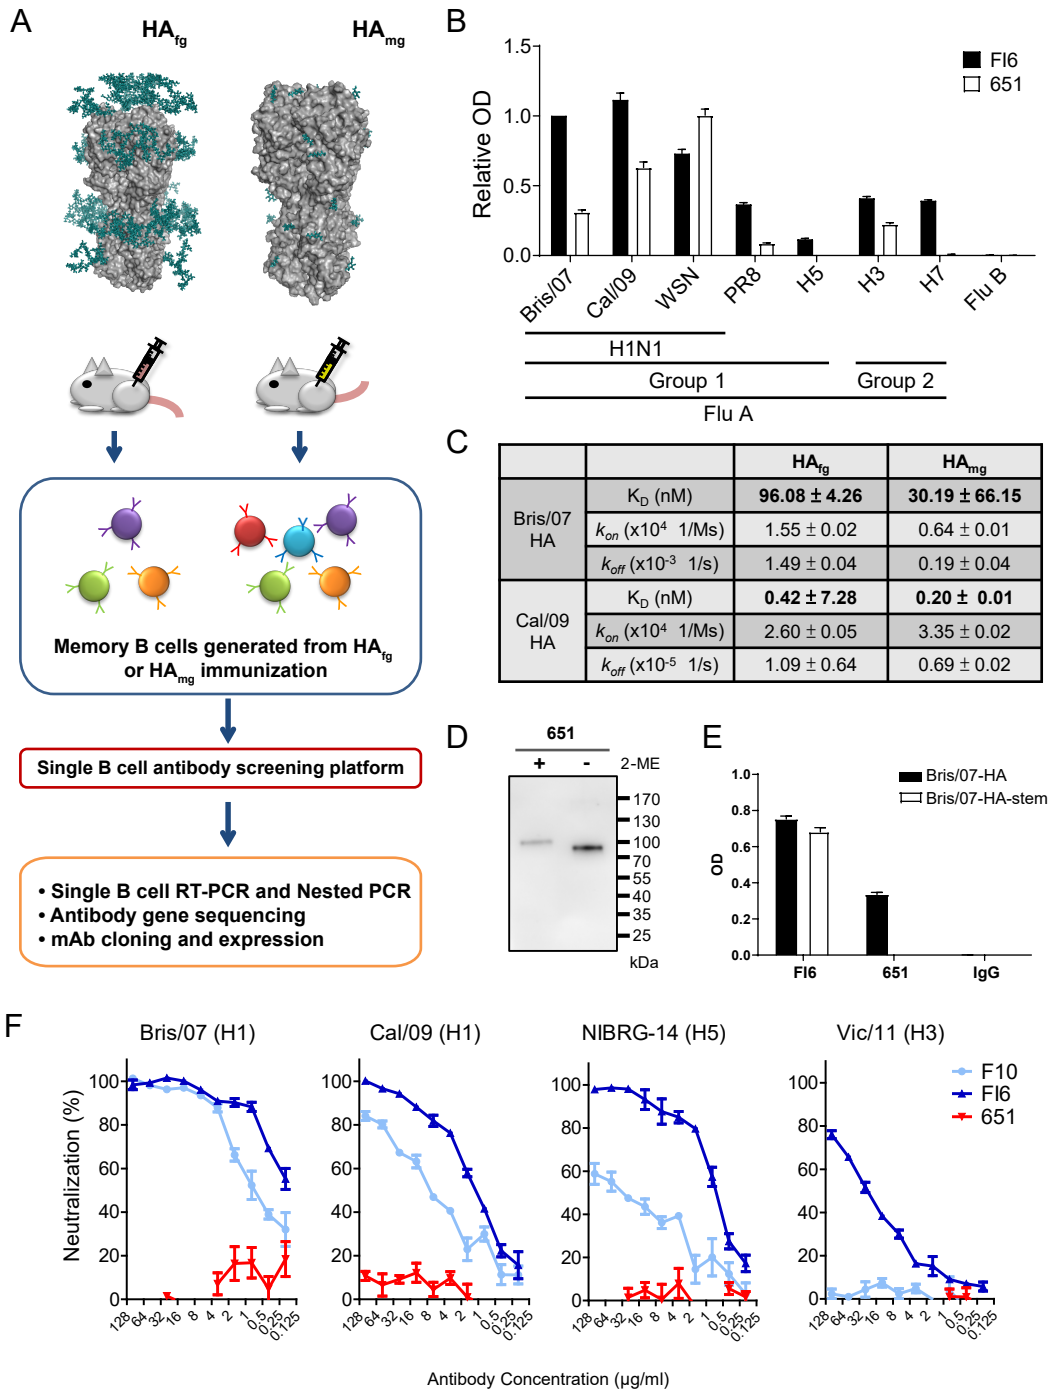



# Ko et al. Figure 2

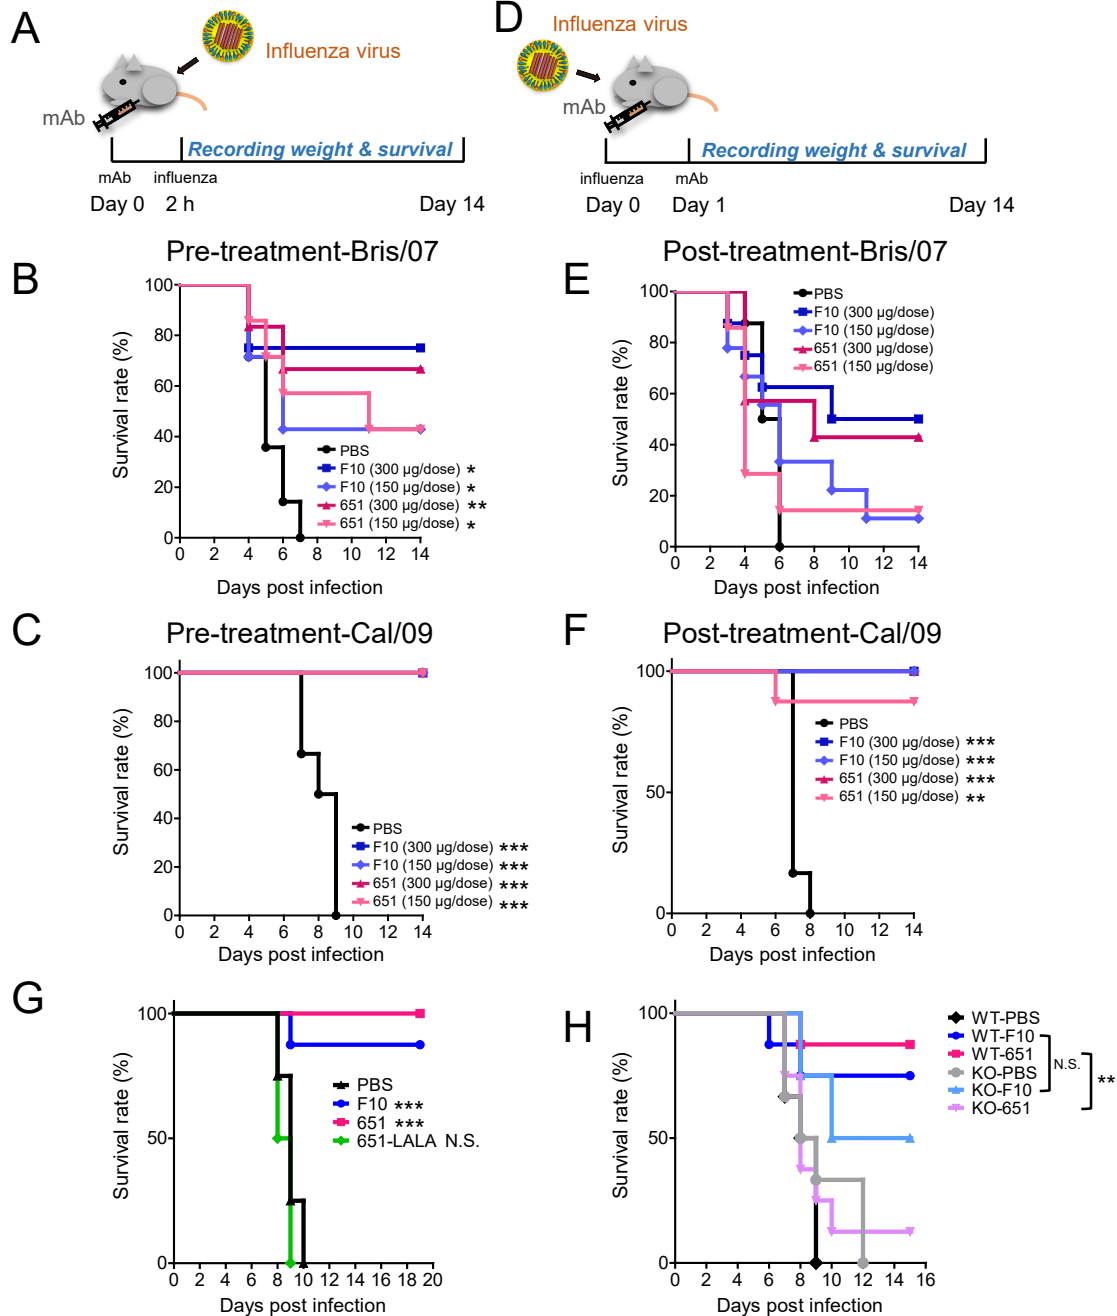

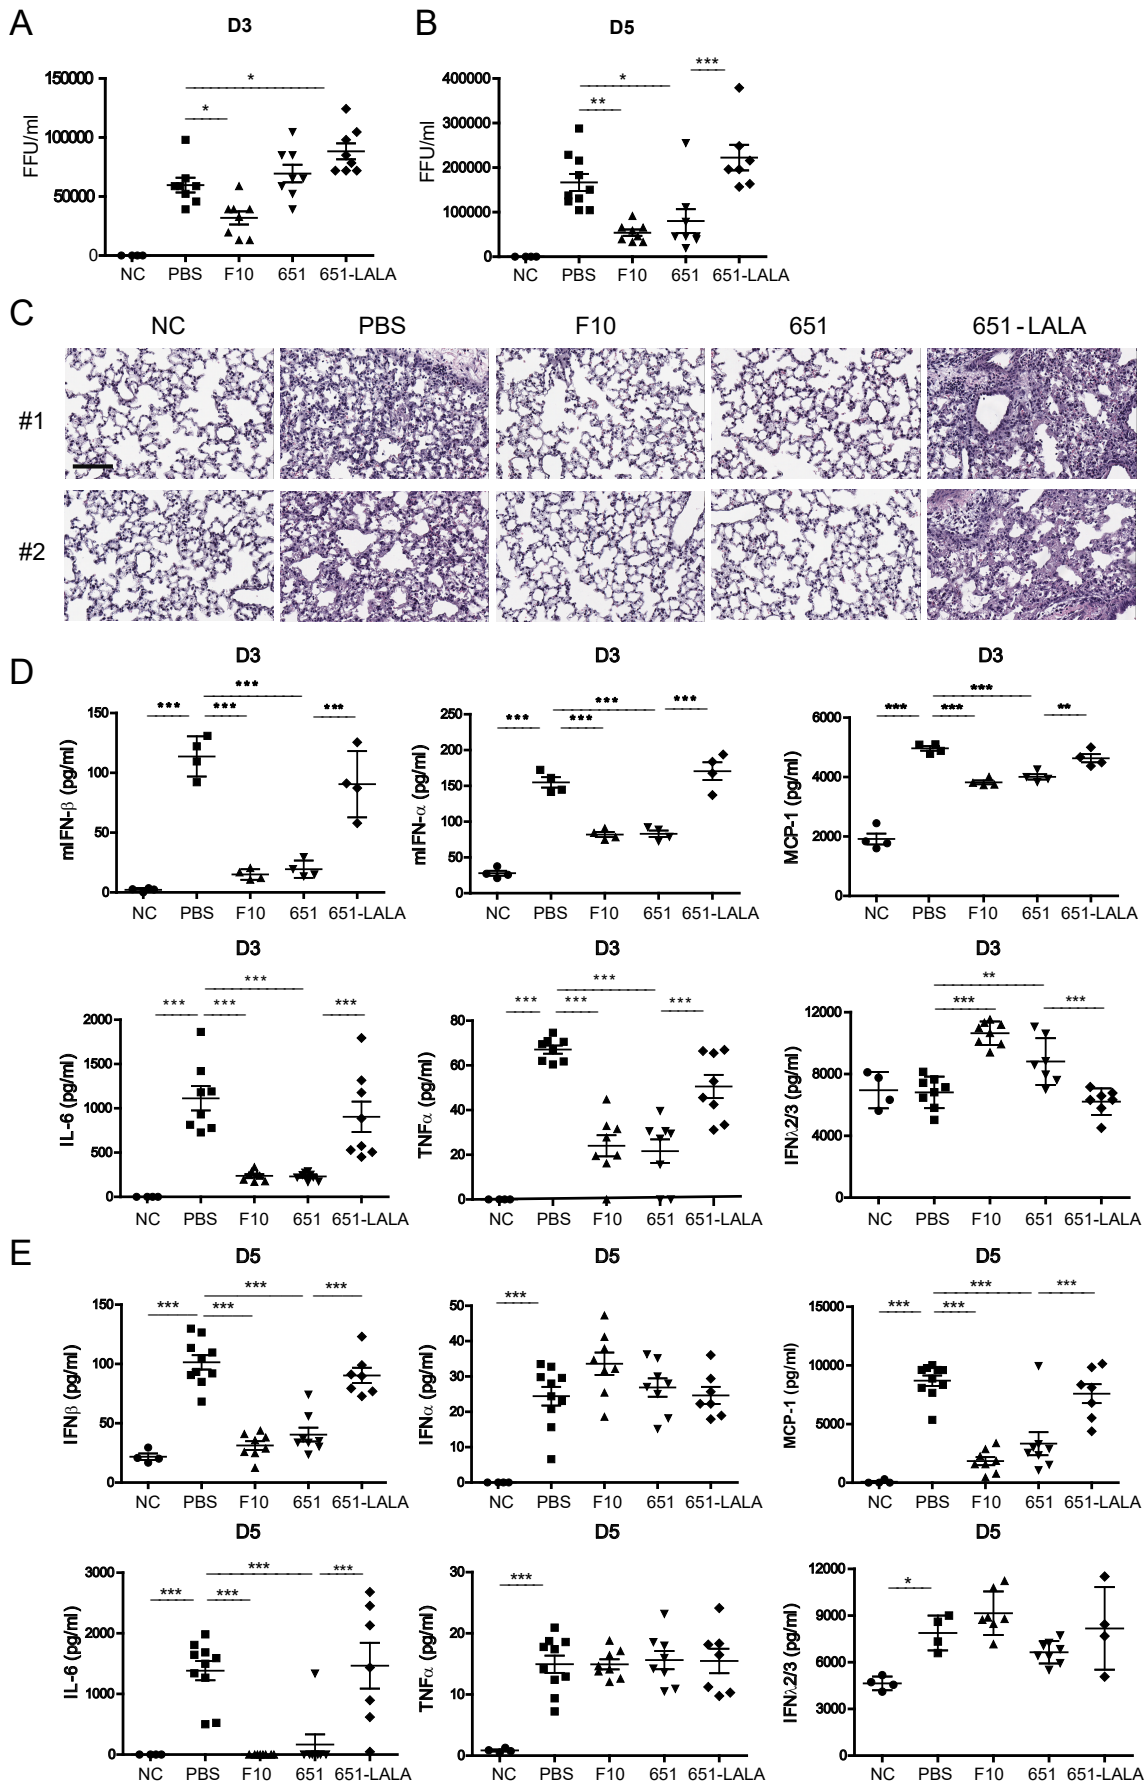

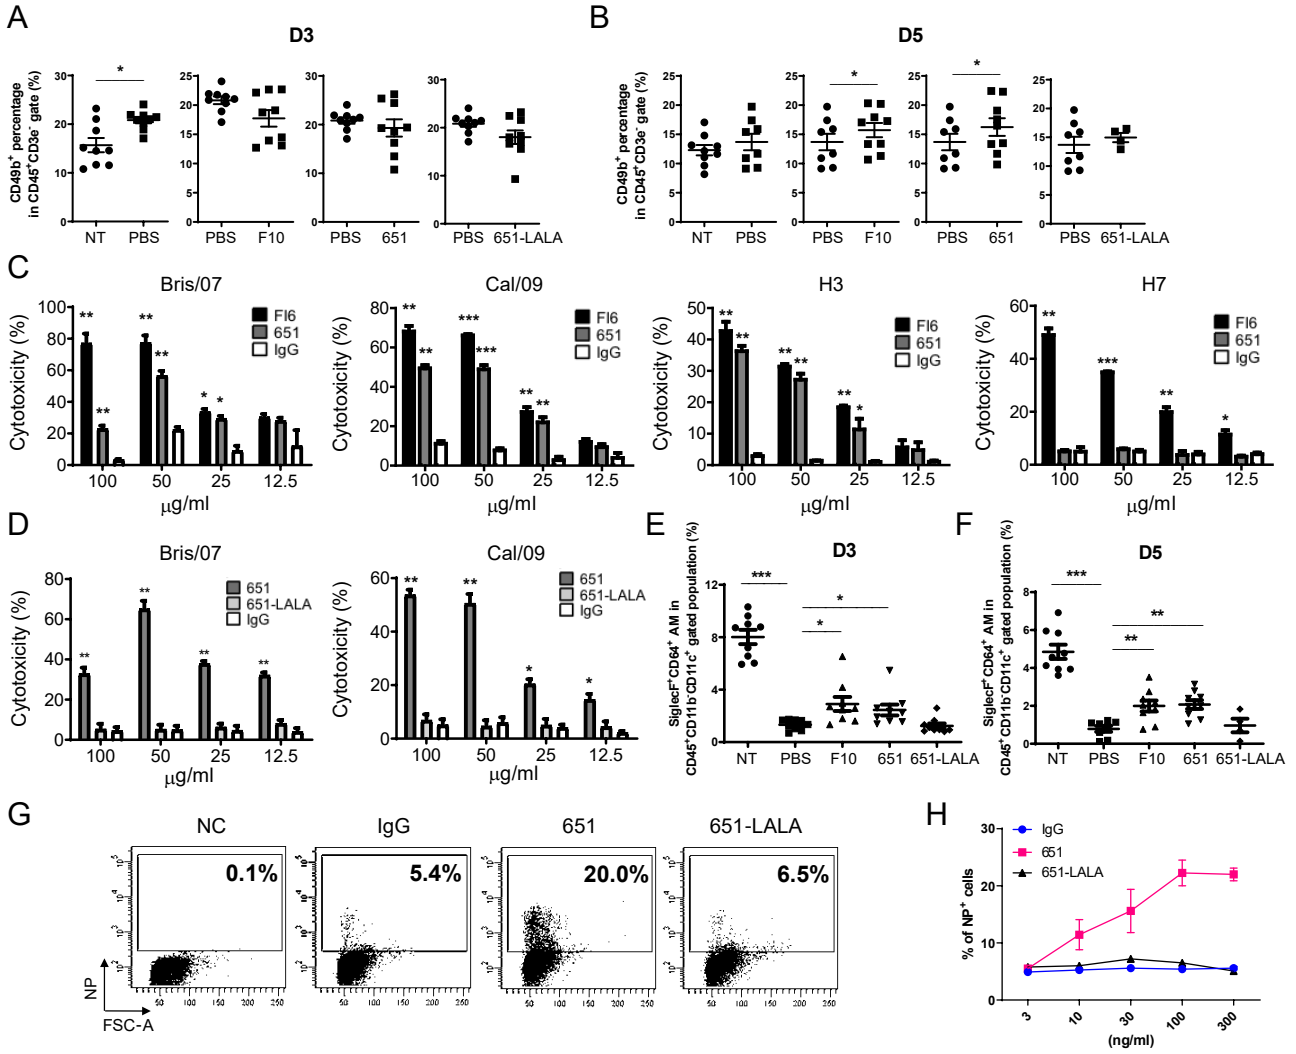

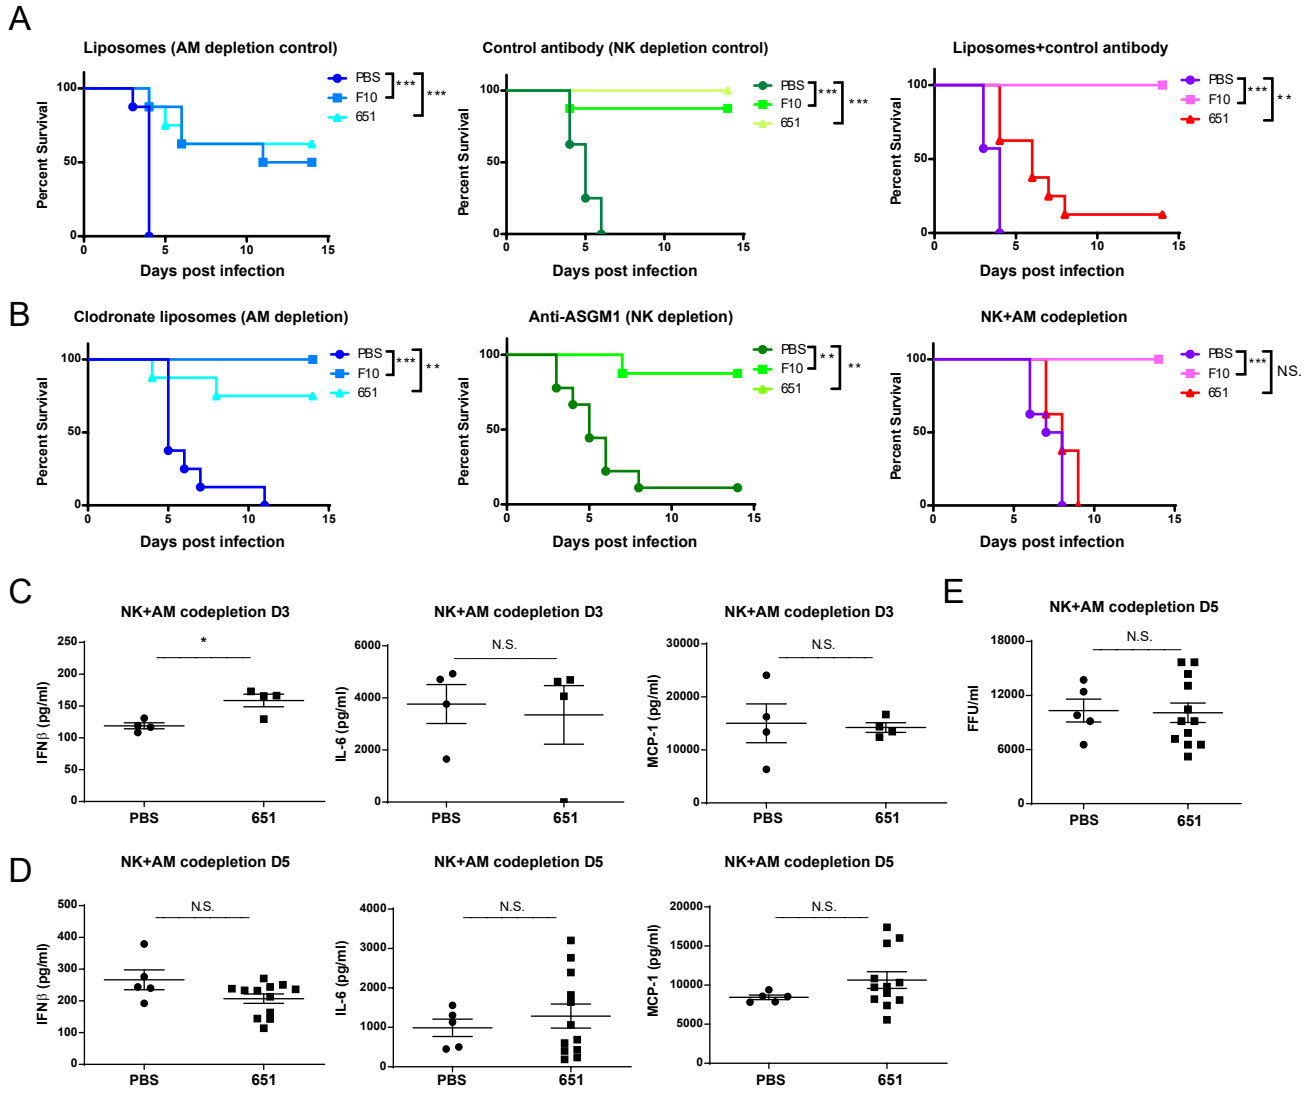

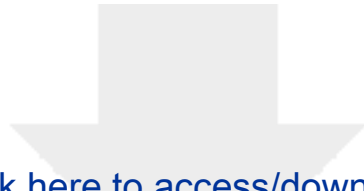

[Click here to access/download](#)

**Supporting Information**

[Ko et al Supplementary information Plos Pathogens.pdf](#)

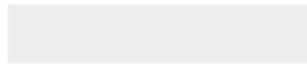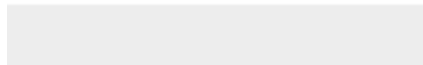

Supplement: ppat.1009724.s005.pdf [file ppat.1009724.s005.pdf]
